# Supplementary material
Source: publisher figshare collection journal article supplement (https://acs.figshare.com/ndownloader/files/26509912)
Supplement: Supplementary file 1 [file 26509912]

## Supporting Information

# Crosslinked PEDOT:PSS Organic Electrochemical Transistors on Interdigitated Electrodes with Improved Stability

*Kan Tang, Wujian Miao, Song Guo\**

Department of Chemistry and Biochemistry, The University of Southern Mississippi, Hattiesburg, Mississippi 39406, United States

\* E-mail [song.guo@usm.edu](mailto:song.guo@usm.edu).

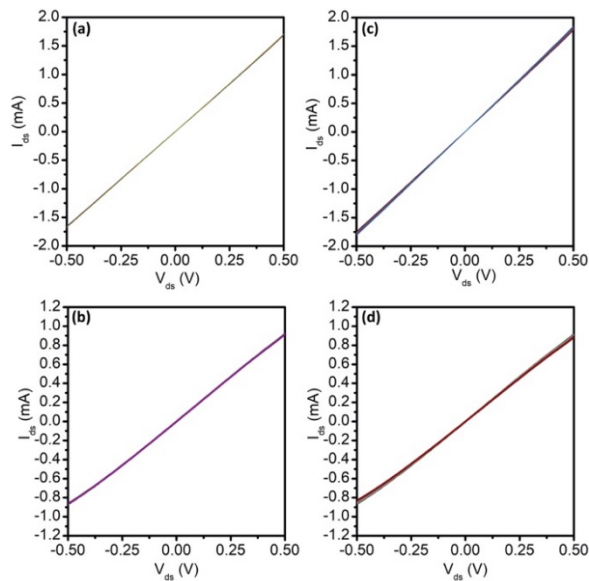

**Figure S1.**  $I$ - $V$  curves of PEDOT:PSS films in PBS buffer containing 0.1 M NaCl for 10 consecutive measurements. (a) Pristine PEDOT:PSS measured every 10 s. (b) Pristine PEDOT:PSS measured every 5 minutes. (c) Crosslinked PEDOT:PSS measured every 10 s. (d) Crosslinked PEDOT:PSS measured every 5 minutes.

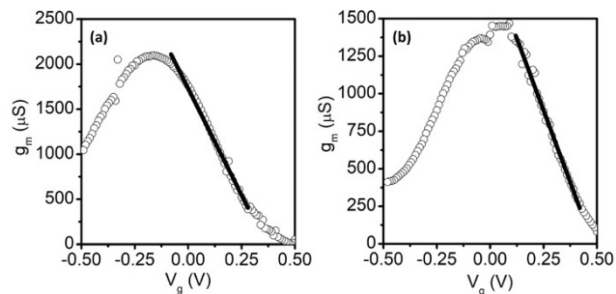

**Figure S2.** Transconductance of PEDOT:PSS OECTs as a function of gate bias ( $V_g$ ). Mobility estimations of both pristine (a) and crosslinked (b) OECTs can be achieved by fitting the slopes of transconductance curves.

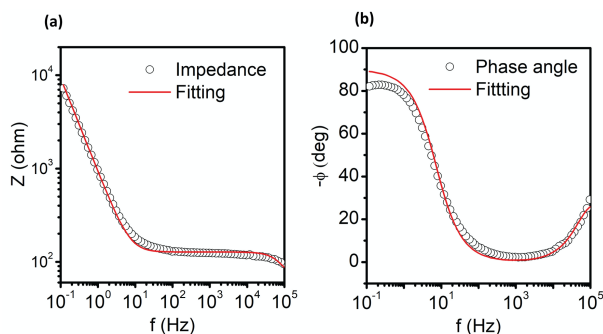

**Figure S3.** Bode plots of electrochemical impedance spectroscopy for PEDOT:PSS film. (a) Impedance  $Z$ . (b) Phase angle. Electrochemical impedance spectroscopy (EIS) for determination of capacitance was conducted in a CHI 660A electrochemical workstation from 10 kHz to 0.1 Hz. PEDOT:PSS film is deposited on FTO glass substrate via spin-coating at 3000 rpm. The surface area of the film is about 0.7 cm<sup>2</sup> and film thickness is about 60 nm. EIS data was measured in 0.1M NaCl aqueous solution, using Ag/AgCl as the reference electrode and a Pt mesh as the counter electrode. DC offset potential was chosen to be zero and an AC amplitude of 10 mV is used. To fit the EIS data, equivalent circuit like  $R_sC$  or  $R_s(R_p||C)$  was adopted. The volumetric capacitance ( $C^*$ ) of PEDOT:PSS is determined to be about 40 F/cm<sup>3</sup>.

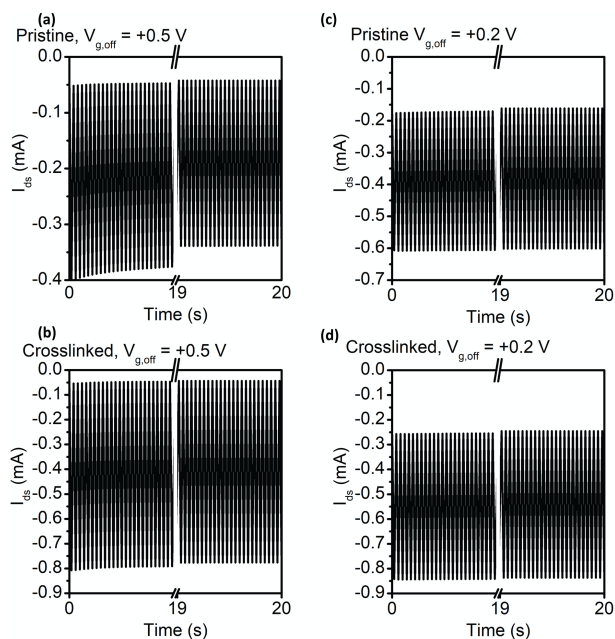

**Figure S4.** Zoomed-in views of the first 50 cycles (0-1s) and last 50 cycles (19-20s) of corresponding results on pulsed gate bias stability in Figure 6. (a) Pristine,  $V_{g, \text{off}} = +0.5$  V. (b) Crosslinked,  $V_{g, \text{off}} = +0.5$  V. (c) Pristine,  $V_{g, \text{off}} = +0.2$  V. (d) Crosslinked,  $V_{g, \text{off}} = +0.2$  V. Note that  $V_{g, \text{on}} = -0.5$  V and  $V_{ds} = -0.5$  V are for all cases.

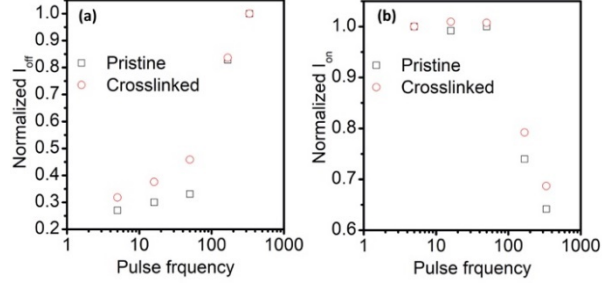

**Figure S5.** Normalized drain current response as a function of pulse frequency. (a) Normalized “on” state current ( $I_{\text{on}}$ ). (b) Normalized “off” state current ( $I_{\text{off}}$ ). Note that in pulse experiments,  $V_{g, \text{off}} = +0.2$  V,  $V_{g, \text{on}} = -0.5$  V,  $V_{ds} = -0.5$  V.

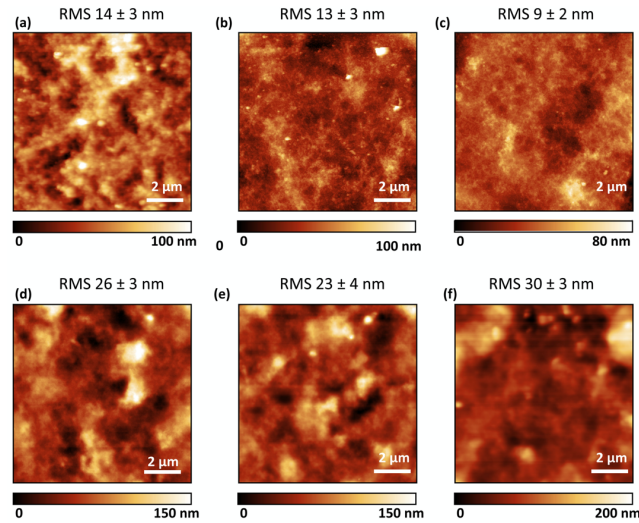

**Figure S6.** Atomic force microscopy topography images of PEDOT:PSS films. (a) Pristine film. (b) Pristine film soaked in PBS buffer for 30 mins. (c) Pristine film after 500 on/off cycles at  $V_g = +0.5$  V to -0.5 V,  $V_{ds} = -0.5$  V. (d) Crosslinked film. (e) Crosslinked film soaked in PBS buffer for 30 mins. (f) Crosslinked film

after 500 on/off cycles at  $V_g = +0.5$  V to  $-0.5$  V,  $V_{ds} = -0.5$  V. All samples were blow dried by  $N_2$  before AFM measurement.
